# Supplementary material for: Polysaccharide-capped silver nanoparticles impregnated cream for the efficient management of wound healing
Source: Royal Society of Chemistry journal article supplement (doi:10.1039/d4pm00274a), 2025-01-01
Supplement: d4pm00274a1.pdf [file d4pm00274a1.pdf]

## **Polysaccharide-capped silver nanoparticles impregnated-cream for the efficient management of wound healing**

HP Syama<sup>a</sup>, BS Unnikrishnan<sup>a,b</sup>, J Sreekutty<sup>a</sup>, MG Archana<sup>a</sup>, GU Preethi<sup>a,b</sup>, PL Reshma<sup>a</sup>, TT Sreelekha<sup>a\*</sup>

<sup>a</sup>Laboratory of Biopharmaceuticals and Nanomedicine, Division of Cancer Research, Regional Cancer Centre (RCC), Thiruvananthapuram-695011, Kerala, India

<sup>b</sup>Department of Pathology, Dalhousie University, Nova Scotia, Canada

### **Supplementary Data**

#### **S1. Stability Study**

Stability testing aims to ensure that the cosmetic product maintains its intended physical, chemical, and microbiological quality, as well as functionality and aesthetics when stored under appropriate conditions. The stability of all formulations was checked for two weeks (measurements will be made on day 1, week 1, and week 2). The pH values, colour, physical appearance, and texture will be tested during the 2 weeks.

#### **Accelerated stability studies**

All the formulations were subjected to a 4-month-long protocol of accelerated stability testing conducted at  $40 \pm 2$  °C. Each formulation was examined for separation appearance, colour, or phase separation changes on consecutive days.

#### **S2. Determination of Total Fatty Substance Content**

Accurately weigh 2g of cream into a conical flask, and add 25 mL of dil. HCl, boil the contents until they are clear. Add the contents in a separating funnel. Add petroleum ether and shake well. Separate the aqueous phase. Filter the petroleum ether extracts through filter paper containing sodium sulphate, previously dried at a temperature of  $90 \pm 2$  C. Distill off the petroleum ether and dry the material remaining in the flask to constant mass.

Total fatty substance percent by mass =  $100 (M_1/M_2)$

where M1 mass in g of residue and M2 mass in g of material taken for the test

### **S3. Test for Heavy metals**

Weigh about 2 g of material in a crucible and heat it in a muffle furnace to ignite it at 600°C to constant mass. Add 3 mL of dil. HCl and make up the volume to 100 mL. Filter the solution and transfer 25 mL of filtrate into Nessler's cylinder. Add 2 mL of dil. acetic acid and 1 mL of the standard lead solution to another Nessler cylinder and make up the volume with water to 25 mL. Add 10 mL hydrogen sulphide solution to each cylinder and makeup to 50 mL with water. Mix and allow to stand for 10 min. Compare the colour in two cylinders. If the colour in the sample is less than that of the standard solution, the sample will pass the test.

### **S4. Determination of Total Viable count after stability**

Each cream formulation was accurately weighed at 1 gm. Emulsify the cream in a few drops of Tween 20, and further dilutions were prepared using 10 % DMSO.

**S4.1. Serial dilution:** All the samples were serially diluted in test tubes marked  $10^{-1}$  to  $10^{-5}$ . 9 mL of 10 % DMSO was taken in all test tubes. To the test tube marked  $10^{-1}$ , 1 mL of the sample was added. From this dilution, 1 mL of the sample was taken and added to  $10^{-2}$  dilutions, and this  $10^{-5}$  dilutions were prepared.

**S4.2. Pour plate method:** Pour plate method was usually the method of choice for counting the colony-forming bacteria in a liquid specimen. This method uses a sterile pipette to place a fixed amount of inoculum (generally 1 mL) from a broth/sample in the centre of a sterile petri dish. Melted agar (approx. 15 mL) was then mixed well into the Petri dish containing the inoculum. After the solidification of the agar, the plate is incubated at 37°C for 24-48 hours to check the number of Colony Forming Units (CFU) in each formulation.

### **S5. Checking for the presence of pathogens**

For the detection of pathogens like *E. coli*, *P. aeruginosa*, *S. aureus* and *C. albicans*, the cream suspension was inoculated on the surface of MacConkey Agar, Cetrimide agar, Baird Parker agar and SDA selective agar plates respectively. The plates were incubated for 72 h at 37°C for bacterial growth and at 30°C for *Candida*.

**Supplementary Table 1: Analytical Parameters**

| Sl.No. | Test                                      | Specification                         |
|--------|-------------------------------------------|---------------------------------------|
| 01     | Appearance                                | Opaque, homogenous cream              |
| 02     | Color                                     | Characteristic                        |
| 03     | pH                                        | 6.00 – 7.50                           |
| 04     | Spreadability                             | Diameters measured                    |
| 05     | Stability                                 | Need to be stable at RT, 4°C and 45°C |
| 06     | Microbial test;<br>1. Total count, CFU/gm | <100                                  |

**Supplementary Table 2: Organoleptic properties of formulated creams**

|                   | Base Cream – 1          | SNP@PSP Cream - 2       | SNP@PSP Cream – 3       | SNP@PSP Cream - 4       |
|-------------------|-------------------------|-------------------------|-------------------------|-------------------------|
| <b>Appearance</b> | Opaque homogenous cream | Opaque homogenous cream | Opaque homogenous cream | Opaque homogenous cream |
| <b>Colour</b>     | White                   | Light yellow            | Light brown             | Light brown             |

**Supplementary Table 3: Stability checking of all cream formulations**

|                   | Appearance                                | Colour | pH   |
|-------------------|-------------------------------------------|--------|------|
| Base cream - 1    | No separation of phases. Homogenous cream | White  | 8.49 |
| SNP@PSP cream – 2 | No separation of phases. Homogenous cream | Yellow | 7.7  |
| SNP@PSPcream – 3  | No separation of phases. Homogenous cream | Yellow | 7.4  |

|                     |                                           |             |     |
|---------------------|-------------------------------------------|-------------|-----|
| SNP@PSPcream<br>– 4 | No separation of phases. Homogenous cream | Light brown | 7.4 |
|---------------------|-------------------------------------------|-------------|-----|

**Supplementary Table 4: Weight loss analysis of SNP@PSP doped cream**

| Sample        | Temperature      | Initial weight (wt of Petri dish-wt of cream) (gm) | Final weight (wt of Petri dish-wt of cream) (gm) | % of Weight loss |
|---------------|------------------|----------------------------------------------------|--------------------------------------------------|------------------|
| SNP@PSP Cream | 4°C              | 33.21                                              | 33.04                                            | 0.51             |
|               | 45°C             | 37.93                                              | 36.92                                            | 2.92             |
|               | Room temperature | 36.92                                              | 36.52                                            | 1.08             |

**Supplementary Table 5: BIS analysis of SNP@PSP incorporated cream**

| Sl. No: | Test                                         | Results | Specifications                      |
|---------|----------------------------------------------|---------|-------------------------------------|
| 1       | pH                                           | 7.6     | IS 6608: 2004, Reaff. 2019, Annex B |
| 2       | Total Fatty substance                        | 7.03    | IS 6608: 2004, Reaff. 2019, Annex B |
| 3       | Total residue                                | 37.43   | IS 6608: 2004, Reaff. 2019, Annex B |
| 4       | Thermal stability                            | Stable  | IS 6608: 2004, Reaff. 2019, Annex B |
| 5       | Heavy metal (as Pb)                          | <20 ppm | IS 6608 2 004, Reaff. 2019, Annex B |
| 6       | Arsenic (as As <sub>2</sub> O <sub>3</sub> ) | <2ppm   | IS 6608: 2004, Reaff. 2019, Annex B |

|    |                      |          |                             |
|----|----------------------|----------|-----------------------------|
| 7  | Yeast and mold count | <10cfu/g | IS 14648: 2011, Reaff. 2016 |
| 8  | <i>E. coli</i>       | Absent/g | IS 14648 :0 11, Reaff. 2016 |
| 9  | <i>S. aureus</i>     | Absent/g | IS 14648: 2011, Reaff. 2016 |
| 10 | <i>P. aeruginosa</i> | Absent/g | IS 14648: 2011, Reaff. 2016 |
| 11 | <i>C. albicans</i>   | Absent/g | IS 14648:2 011, Reaff. 2016 |
| 12 | Total Viable Count   | <10cfu/g | IS 14648: 2011, Reaff. 2016 |

**Supplementary Table 6: Measurement of zone diameter in Disc diffusion method**

| Organism          | Positive control | Base Cream 1 | SNP@PSP Cream 2 | SNP@PSP Cream 3 | SNP@PSP Cream 4 |
|-------------------|------------------|--------------|-----------------|-----------------|-----------------|
| <i>S aureus</i>   | 45 ± 5 mm        | 9 ± 3 mm     | 18 ± 4 mm       | 20 ± 3 mm       | 22 ± 3 mm       |
| <i>C albicans</i> | 32 ± 3 mm        | -            | 15 ± 3mm        | 18 ± 2 mm       | 21 ± 3 mm       |

**Supplementary Table 7: Measurement of the zone diameter in the Well plate method**

| Organism          | positive control | SNP@PSP Cream 2 | SNP@PSP Cream 3 | SNP@PSP Cream 4 |
|-------------------|------------------|-----------------|-----------------|-----------------|
| <i>S aureus</i>   | 43 ± 2 mm        | 19 ± 2 mm       | 21 ± 3 mm       | 23 ± 4 mm       |
| <i>C albicans</i> | 42 ± 3 mm        | 18 ± 2 mm       | 20 ± 2 mm       | 21 ± 3 mm       |

**Supplementary Table 8: Microscopic appearance of wound tissues in H & E staining**

| SL. No | Group          | Microscopic appearance                                                                                                                                                      |
|--------|----------------|-----------------------------------------------------------------------------------------------------------------------------------------------------------------------------|
| 1      | Control        | The dermis shows focal collections of lymphocytes and fibroblasts, and the surrounding area shows dense fibrosis. The deep dermis shows scattered inflammatory infiltrates. |
| 2      | Silverex cream | Dermis shows scattered lymphocytic infiltrates, fibroblasts and appendages; the surrounding area shows dense fibrosis.                                                      |

|   |                       |                                                                                                                                                                                                                                        |
|---|-----------------------|----------------------------------------------------------------------------------------------------------------------------------------------------------------------------------------------------------------------------------------|
|   | treated               |                                                                                                                                                                                                                                        |
| 3 | SNP@PSP cream treated | Skin shows epidermis with Re-epithelialization. The epidermis shows scattered inflammatory infiltrates, fibroblasts and thin-walled capillaries in a fibrocollagenous stroma. The deep dermis shows moderate inflammatory infiltrates. |
| 4 | Base cream treated    | Sub epithelium shows dense fibro collagenous stroma, appendages and scattered inflammatory infiltrates.                                                                                                                                |

**Supplementary Table 9: Reaction of wound tissues in Cox 2 and Veg F immune histochemistry**

| SL. No: | Sample                  | COX 2                                               | Veg F        |
|---------|-------------------------|-----------------------------------------------------|--------------|
| 1       | Control                 | Immunoreactive (2+)<br>Nuclear positivity (+)       | Negative (0) |
| 2       | Silverex treated        | Immunoreactive (1+)<br>Focal Nuclear positivity (+) | Negative (0) |
| 3       | SNP @ PSP Cream treated | Immunoreactive (1+)<br>Nuclear positivity (+)       | Negative (0) |
| 4       | Base cream              | Immunoreactive (1+)<br>Nuclear positivity (+)       | Negative (0) |

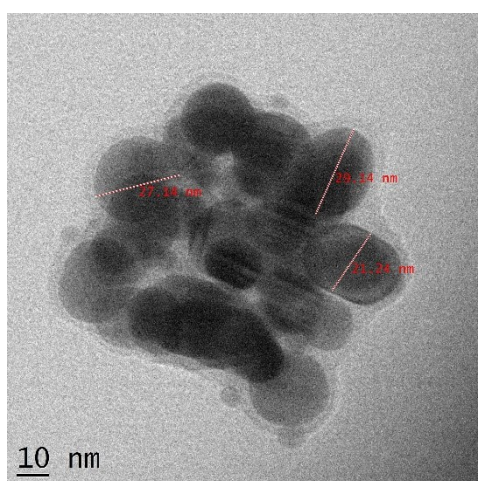

Supplementary Figure 1: TEM image of SNP@PSP

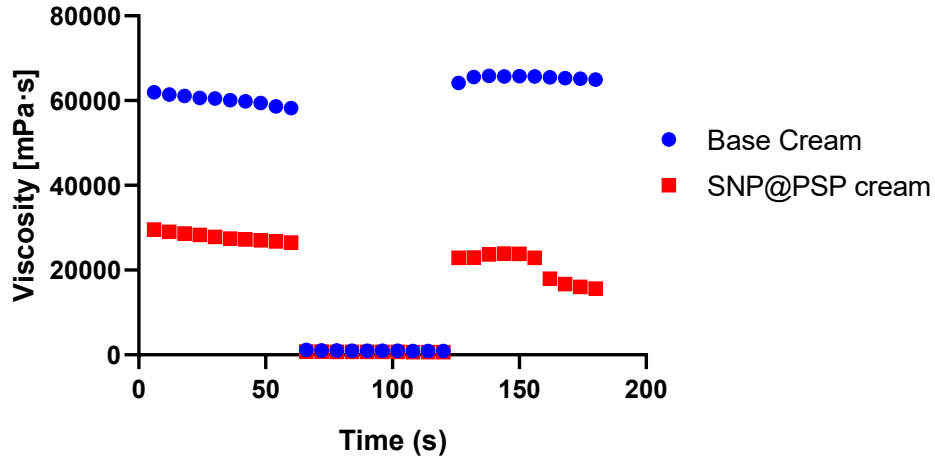

Supplementary Figure 2: Rheological behaviour of Base Cream and SNP@PSP Cream using thixotropic behaviour analysis

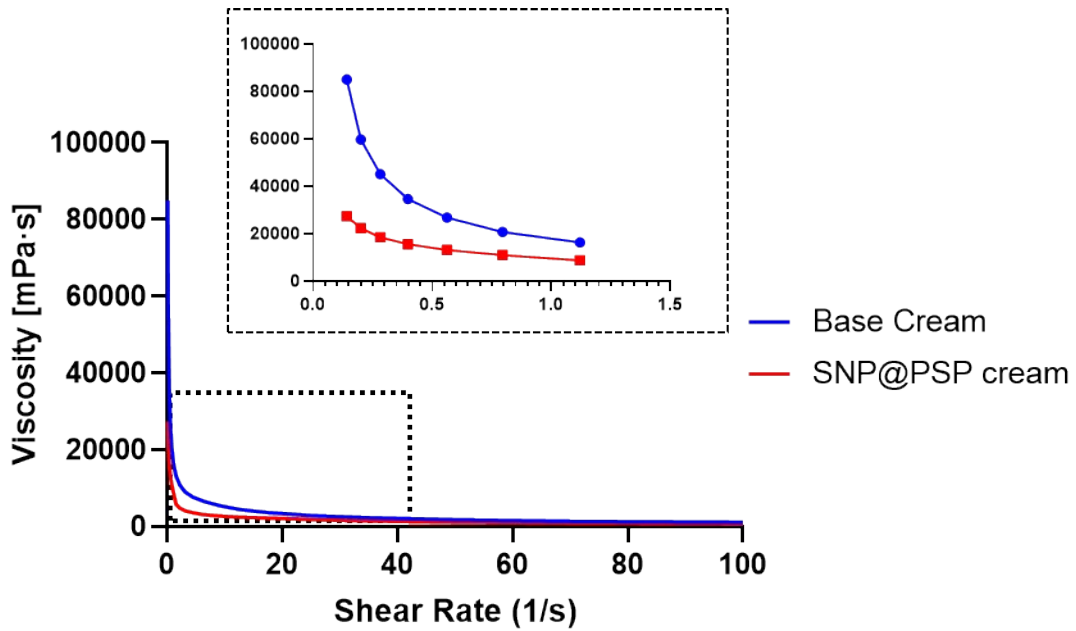

Supplementary Figure 3: Rheological behaviour of Base Cream and SNP@PSP Cream using viscosity analysis. Inset shows the viscosity difference after the addition of SNP@PSP in base cream at lower shear rates

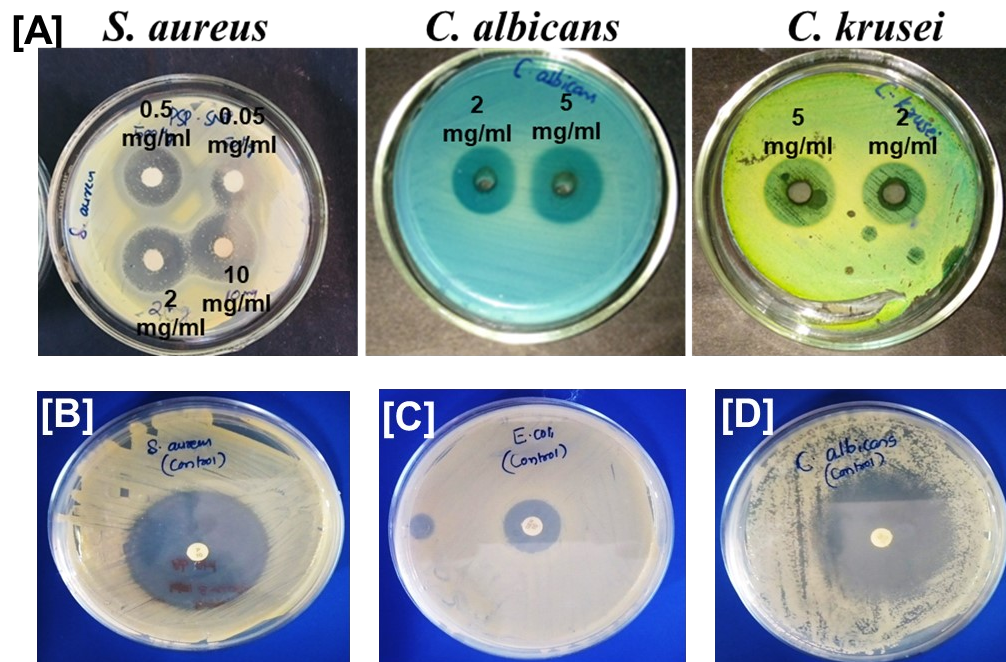

**Supplementary Figure 4: (A) Antimicrobial activity of cream formulations on Muller Hinton agar plates- zone of inhibition of susceptible test organisms (*S. aureus*, *C. albicans* and *C. krusei*) (B) Positive control plates for *S. aureus*, (C) *E. coli* and (D) *C. albicans* with Penicillin, gentamycin and Fluconazole sensitivity discs respectively**



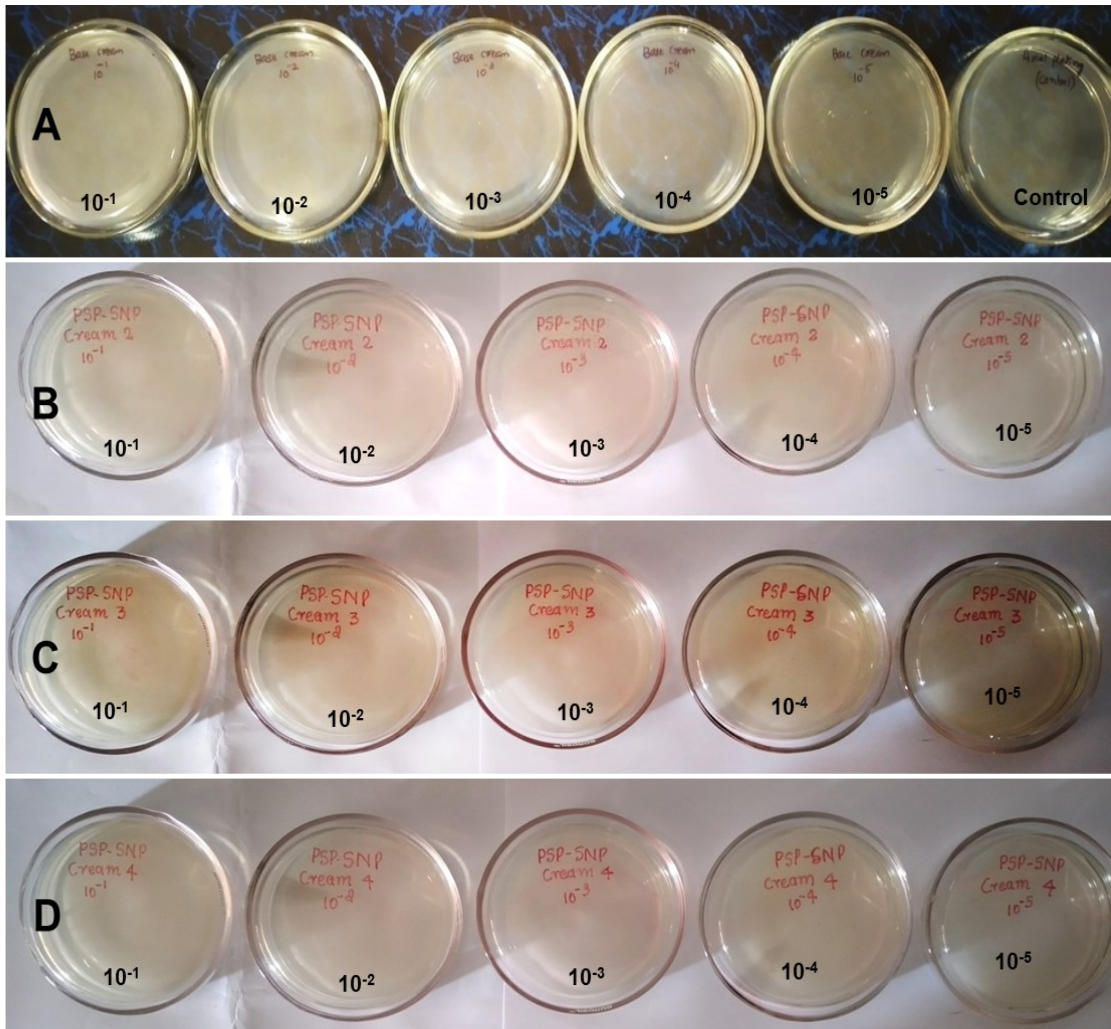

**Supplementary Figure 5: Spread plate assay for determining the microbial contamination of (A) Base cream (B) SNP@PSP cream -1 (C) SNP@PSP cream-2 (D) SNP@PSP cream-3**

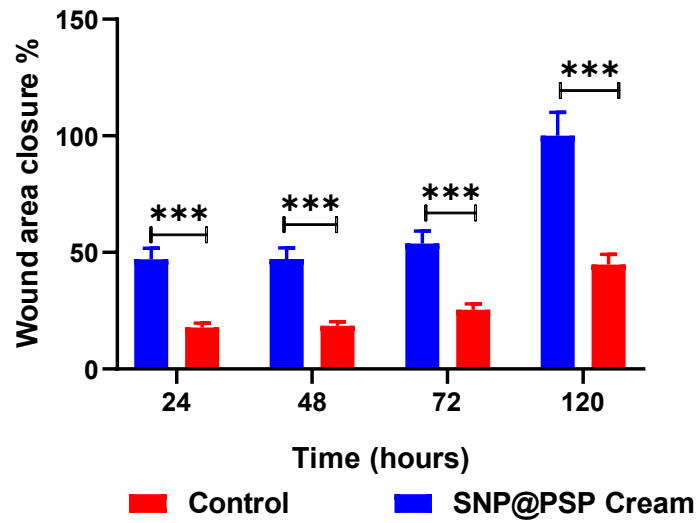

Supplementary Figure 6: In vitro percentage wound area closure of cells treated with control and SNP@PSP cream. Results were expressed as mean  $\pm$  SD (n = 3)

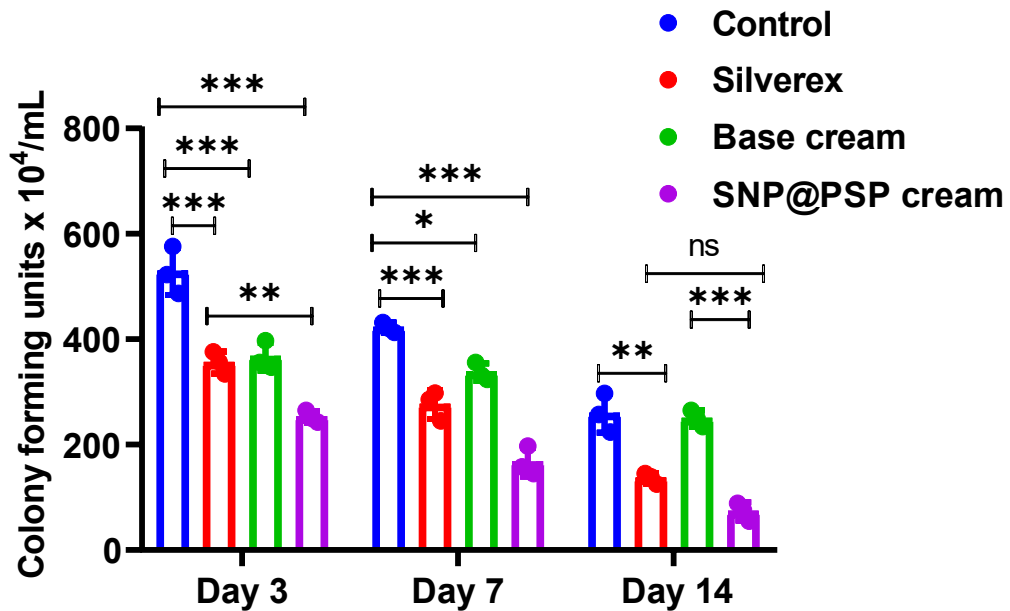

Supplementary Figure 7: Total viable counts of microbes (Colony forming units  $\times 10^4$ /mL) from the wound area of mice in different treatment groups at different time points
